# Supplementary material
Source: PubMed Central journal article supplement (PMC3448029)
Supplement: NIHMS388781-supplement-1_si_001.pdf [file NIHMS388781-supplement-1_si_001.pdf]

## Supplemental Information

Table S1. Batches of cells analyzed.

| Batch   | Packing Expt.                                                                                                       | Mössbauer Spectroscopy | EPR Spectroscopy | UV-Vis Spectroscopy | ICP-MS   |
|---------|---------------------------------------------------------------------------------------------------------------------|------------------------|------------------|---------------------|----------|
| C01-C05 | <i>Whole cells in from C01-C05 were used solely for mitochondria isolation and Western Blot analysis for purity</i> |                        |                  |                     |          |
| C06     | Yes                                                                                                                 | Weak                   | Table 1          | -                   | Table S4 |
| C07     | -                                                                                                                   | Figure 5A, 5B, and 5C  | Table 1          | -                   | Table S4 |
| C08     | Yes                                                                                                                 | -                      | -                | -                   | Table S4 |
| C09     | -                                                                                                                   | -                      | -                | Table 1             | -        |
| C10     | -                                                                                                                   | -                      | -                | Figure 3C and 3D    | -        |
| C11     | -                                                                                                                   | -                      | Figure 4A and 4B | -                   | Table S4 |
| C12     | -                                                                                                                   | -                      | -                | Table 1             | -        |
| C13     | -                                                                                                                   | Figure S1A and S1B     | Table 1          | Table 1             | -        |
| C14     | Table S3                                                                                                            | -                      | -                | -                   | Table S4 |

Table S2. Batches of mitochondria analyzed

| Batch | Cell batch used | Western Blot | EM       | Packing Expt. | Mössbauer Spectroscopy | EPR              | UV-Vis           | ICP-MS   |
|-------|-----------------|--------------|----------|---------------|------------------------|------------------|------------------|----------|
| M01   | C01             | Yes          | -        | -             | -                      | Table 1          | Table 1          | -        |
| M02   | C02             | Yes          | Yes      | -             | -                      | -                | -                | Table S4 |
| M03   | C06             | Figure 1     | Yes      | -             | Figure S1D             | -                | Table 1          | -        |
| M04   | C08             | -            | -        | -             | Figure 2A, 2B, 2C      | -                | -                | -        |
| M05   | C09             | -            | -        | Yes           | -                      | Figure 4C        | Table 1          | Table S4 |
| M06   | C10             | -            | Figure 1 | Yes           | Table 1                | Figure 4A and 4B | Figure 3A and 3B | Table S4 |
| M07   | C11             | -            | -        | Yes           | -                      | Table 1          | Table 1          | Table S4 |
| M08   | C13             | -            | -        | -             | Figure S1C             | Table 1          | -                | -        |
| M09   | C14             | -            | -        | Table S3      | -                      | -                | -                | Table S4 |

Table S3. Volumes of pellets of whole cells and isolated mitochondria determined from packing experiments and calculated packing efficiencies.

| Sample (Run)                                   | $C_{\text{sup1,2}}$ ( $\mu\text{M}$ ) | $V_{\text{sup1,2}}$ ( $\mu\text{L}$ ) | $V_{\text{int1,2}}$ ( $\mu\text{L}$ ) | $V_{\text{pellet 1,2}}$ ( $\mu\text{L}$ ) | Packing efficiency (%) |
|------------------------------------------------|---------------------------------------|---------------------------------------|---------------------------------------|-------------------------------------------|------------------------|
| Whole cells                                    |                                       |                                       |                                       |                                           |                        |
| C14.1 (1)                                      | 82                                    | 200                                   | 43                                    | 250                                       | 83                     |
| C14.1 (2)                                      | 18                                    | 200                                   | 57                                    | 250                                       | 77                     |
| C14.2 (1)                                      | 91                                    | 200                                   | 18                                    | 250                                       | 93                     |
| C14.2 (2)                                      | 20                                    | 210                                   | 59                                    | 225                                       | 74                     |
| C14.3 (1)                                      | 84                                    | 200                                   | 38                                    | 250                                       | 85                     |
| C14.3 (2)                                      | 19                                    | 210                                   | 61                                    | 250                                       | 76                     |
| C14.4 (1)                                      | 77                                    | 200                                   | 59                                    | 300                                       | 80                     |
| C14.4 (2)                                      | 15                                    | 200                                   | 48                                    | 275                                       | 83                     |
| <b>Mean packing efficiency of whole cells</b>  |                                       |                                       |                                       |                                           | <b>81±6</b>            |
| Mitochondria                                   |                                       |                                       |                                       |                                           |                        |
| M09.1 (1)                                      | 65                                    | 151                                   | 80                                    | 175                                       | 55                     |
| M09.1 (2)                                      | 10                                    | 143                                   | 26                                    | 100                                       | 74                     |
| M09.2 (1)                                      | 67                                    | 151                                   | 73                                    | 150                                       | 51                     |
| M09.2 (2)                                      | 12                                    | 140                                   | 31                                    | 100                                       | 69                     |
| M09.3 (1)                                      | 76                                    | 149                                   | 48                                    | 150                                       | 68                     |
| M09.3 (2)                                      | 13                                    | 150                                   | 31                                    | 100                                       | 69                     |
| M09.4 (1)                                      | 64                                    | 149                                   | 85                                    | 175                                       | 51                     |
| M09.4 (2)                                      | 10                                    | 140                                   | 26                                    | 100                                       | 74                     |
| M09.5 (1)                                      | 64                                    | 200                                   | 112                                   | 225                                       | 50                     |
| M09.5 (2)                                      | 12                                    | 195                                   | 45                                    | 175                                       | 74                     |
| M09.6 (1)                                      | 82                                    | 195                                   | 45                                    | 200                                       | 77                     |
| M09.6 (2)                                      | 14                                    | 210                                   | 43                                    | 150                                       | 72                     |
| <b>Mean packing efficiency of mitochondria</b> |                                       |                                       |                                       |                                           | <b>65±10</b>           |

Table S4. Metal concentrations from each batch

|                           | [Fe] (μM) | [Cu] (μM) | [Mn] (μM) | [Zn] (μM) |
|---------------------------|-----------|-----------|-----------|-----------|
| <b>Whole cell batch</b>   |           |           |           |           |
| C06                       | 336       | 22        | 6.7       | 323       |
| C06                       | 346       | 25        | 7.0       | 353       |
| C07                       | 341       | 25        | 7.4       | 385       |
| C07                       | 385       | 29        | 7.4       | 384       |
| C08                       | 469       | 30        | 7.4       | 574       |
| C08                       | 509       | 36        | 6.8       | 617       |
| C11                       | 447       | 33        | 7.4       | 665       |
| C11                       | 468       | 29        | 6.7       | 555       |
| C14                       | 325       | 27        | 8.6       | 630       |
| Average ± SD              | 402 ±70   | 28±4      | 7.2±0.6   | 498±135   |
|                           |           |           |           |           |
| <b>Mitochondria batch</b> |           |           |           |           |
| M02                       | 1140      | 112       | 17        | 72        |
| M05                       | 1160      | 115       | 17        | 57        |
| M06                       | 1210      | 129       | 11        | 245       |
| M07                       | 1130      | 112       | 11        | 232       |
| M09                       | 960       | 108       | 16        | 227       |
| Average ± SD              | 1120±95   | 115±8     | 14±3      | 167±94    |

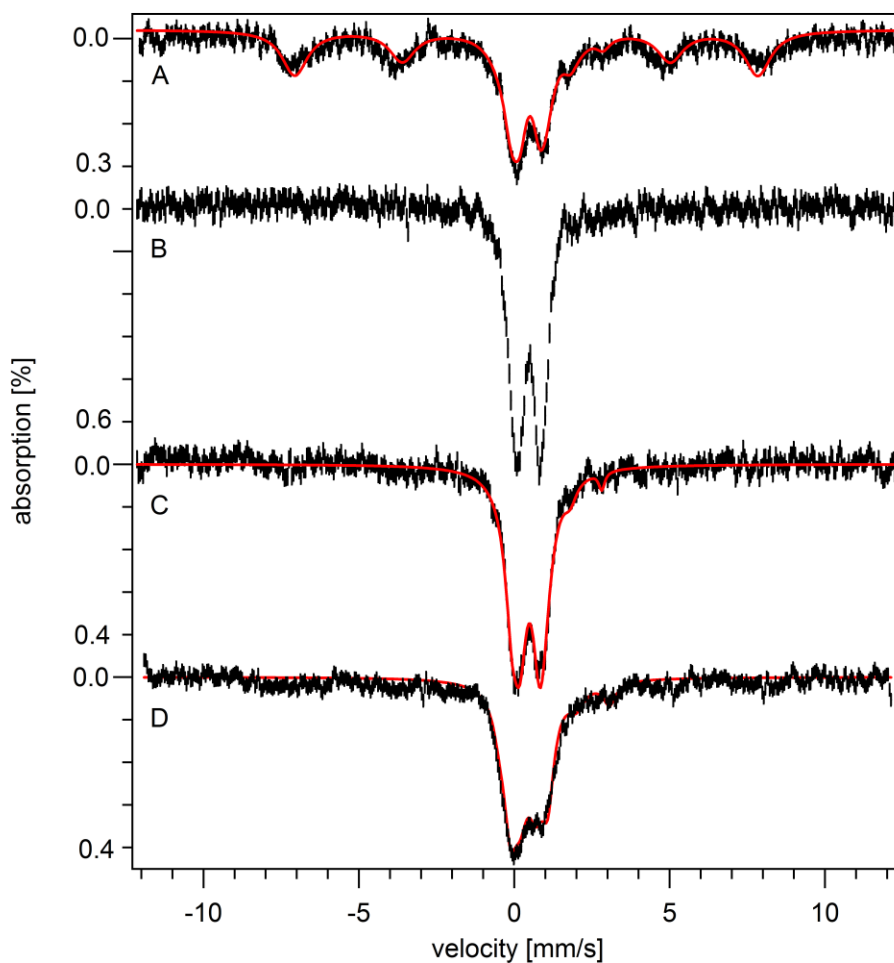

Figure S1. Low field (0.05 T) Mössbauer spectra of other batches. A, 5 K spectrum of whole cells, batch C13 (Table S1), with simulation in red (11% NHHS Fe<sup>II</sup>, 28% CD, 3% HS Fe<sup>II</sup> Hemes, 18% Fe<sup>III</sup> oxyhydroxide nanoparticles, 40% ferritin). B, 70 K spectrum of the same batch of cells. C, 5 K spectrum of isolated mitochondria, batch M08 (Table S2), with simulation in red (7% NHHS Fe<sup>II</sup>, 27% CD, 5% HS Fe<sup>II</sup> Hemes, 40% Fe<sup>III</sup> oxyhydroxide nanoparticles, 19% ferritin-like). D, 5 K spectrum of isolated mitochondria, batch M03 (Table S2), with simulation in red (9% NHHS Fe<sup>II</sup>, 29% CD, 5% HS Fe<sup>II</sup> Hemes, 37% Fe<sup>III</sup> oxyhydroxide nanoparticles, 18% ferritin-like). For all spectra, the field was applied parallel to the radiation.

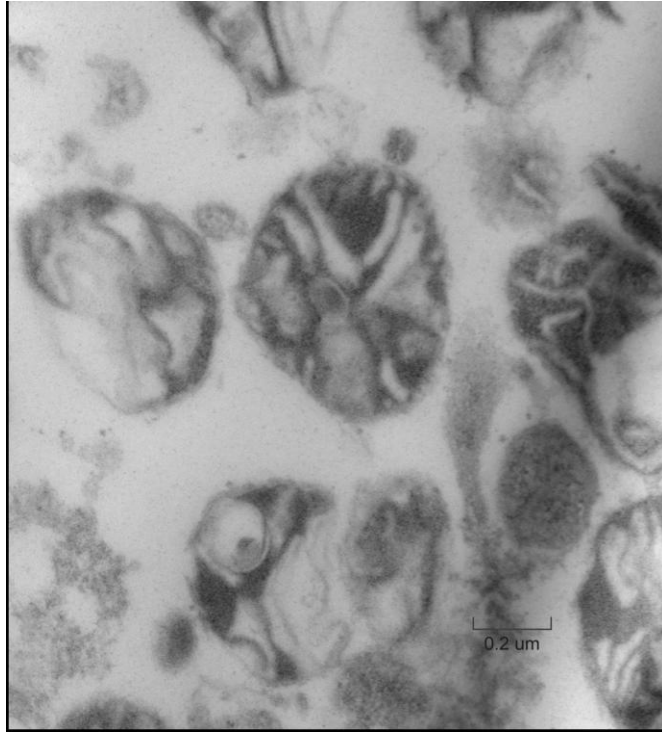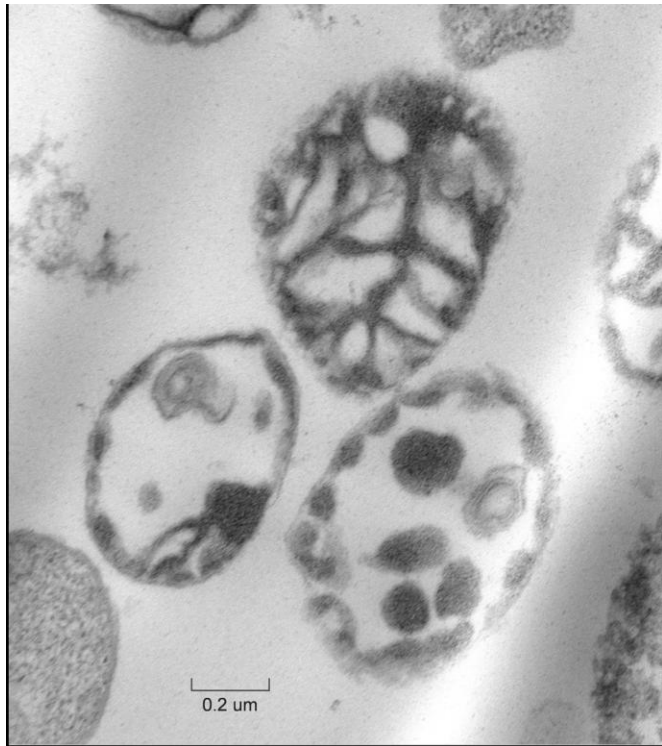

Figure S2. Additional electron micrographs of isolated mitochondria (X 40 000).
